# Supplementary material for: Horse Injury during Non-Commercial Transport: Findings from Researcher-Assisted Intercept Surveys at Southeastern Australian Equestrian Events
Source: MDPI journal article supplement (doi:10.3390/ani6110065), 2016-10-25
Supplement: s1 [file s1]

ID

ID

# University of Adelaide Survey of Horse Injury During Transportation

## For trucks

Tray/single body ☐ Gross vehicle weight or mass \_\_\_\_\_ kg Number of axles \_\_\_\_\_  
Semi-trailer ☐ Gross combined weight rating \_\_\_\_\_ kg Air brakes? Yes ☐ No ☐

ID

### 12. If a float was towed, what type was it?

Straight load ☐ Angle load ☐ Gooseneck ☐ Other (specify) ☐ \_\_\_\_\_

### 13. What was the maximum number of horses that the float or truck was capable of carrying?

1 2 3 4 5 6 7 8 9 10 Other  
☐ ☐ ☐ ☐ ☐ ☐ ☐ ☐ ☐ ☐ ☐

### 14. How many horses were carried during the trip during which the accident occurred?

1 2 3 4 5 6 7 8 9 10 Other  
☐ ☐ ☐ ☐ ☐ ☐ ☐ ☐ ☐ ☐ ☐

### 15. If the vehicle or float was damaged in the accident, please indicate where below (tick all that apply)

|         | Front                    | Side(s)                  | Rear                     | Roof                     | Chassis                  | Write-off                | Other |
|---------|--------------------------|--------------------------|--------------------------|--------------------------|--------------------------|--------------------------|-------|
| Float   | <input type="checkbox"/> | _____ |
| Vehicle | <input type="checkbox"/> | _____ |

### 16. Please mark the numbers corresponding to the regions of the horse injured on the schematic below

No injury 1 2 3 4 5 6 7  
☐ ☐ ☐ ☐ ☐ ☐ ☐ ☐

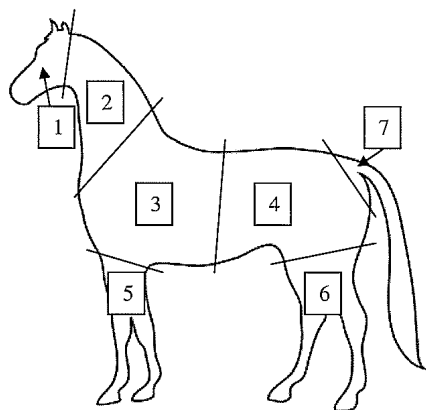

### 17. Please rank the injury to the horse(s)

- ☐ None
- ☐ Minor (requiring owner administered first aid)
- ☐ Moderate (requiring veterinary attention)
- ☐ Marked (requiring intensive veterinary management)
- ☐ Severe (causing death/ requiring euthanasia of horse)

### 18. Please indicate if the horse(s), float or vehicle were insured at the time of the accident and if a claim was made as a result?(tick all applicable)

| Float                             |                                      | Vehicle                           |                                      | Horse(s)                          |                                      |
|-----------------------------------|--------------------------------------|-----------------------------------|--------------------------------------|-----------------------------------|--------------------------------------|
| insured? <input type="checkbox"/> | claim made? <input type="checkbox"/> | insured? <input type="checkbox"/> | claim made? <input type="checkbox"/> | insured? <input type="checkbox"/> | claim made? <input type="checkbox"/> |

### 19. Please provide a brief outline of the particulars of accident

---



---



---



---



---

## 20. Which factors do you believe may have contributed to the accident?

|                                                                                                                                                                                                                                                                                                                                                                                                                                               |                                                                                                                                                                                                                                                                                                                                                                                       |                                                                                                                                                                                                                                                                                                      |
|-----------------------------------------------------------------------------------------------------------------------------------------------------------------------------------------------------------------------------------------------------------------------------------------------------------------------------------------------------------------------------------------------------------------------------------------------|---------------------------------------------------------------------------------------------------------------------------------------------------------------------------------------------------------------------------------------------------------------------------------------------------------------------------------------------------------------------------------------|------------------------------------------------------------------------------------------------------------------------------------------------------------------------------------------------------------------------------------------------------------------------------------------------------|
| <b>Collision with</b><br><input type="checkbox"/> another vehicle<br><input type="checkbox"/> a stationary object<br><input type="checkbox"/> wild or native animal<br><input type="checkbox"/> domesticated animal<br><b>Horse</b><br><input type="checkbox"/> loss of footing<br><input type="checkbox"/> injury by other horse<br><input type="checkbox"/> poor behaviour<br><input type="checkbox"/> injured by part of transport vehicle | <b>Driver</b><br><input type="checkbox"/> fatigue<br><input type="checkbox"/> illness<br><input type="checkbox"/> error<br><input type="checkbox"/> inexperience<br>distraction by <input type="checkbox"/> passengers<br><input type="checkbox"/> telephone<br><input type="checkbox"/> music<br><input type="checkbox"/> other<br><input type="checkbox"/> horses being transported | <b>Mechanical failure</b><br><input type="checkbox"/> towing vehicle<br><input type="checkbox"/> float<br><input type="checkbox"/> truck<br><br><input type="checkbox"/> <b>Weather conditions</b><br><input type="checkbox"/> <b>Road conditions</b><br><input type="checkbox"/> <b>Time of day</b> |
|-----------------------------------------------------------------------------------------------------------------------------------------------------------------------------------------------------------------------------------------------------------------------------------------------------------------------------------------------------------------------------------------------------------------------------------------------|---------------------------------------------------------------------------------------------------------------------------------------------------------------------------------------------------------------------------------------------------------------------------------------------------------------------------------------------------------------------------------------|------------------------------------------------------------------------------------------------------------------------------------------------------------------------------------------------------------------------------------------------------------------------------------------------------|

Other factors

---



---



---



---



---



---
